# Supplementary material
Source: PubMed Central journal article supplement (PMC387330)

0 min

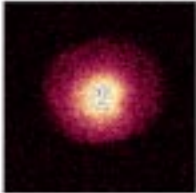

0 min

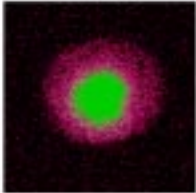

5 min

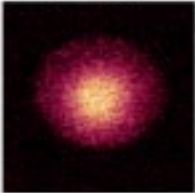

10 min

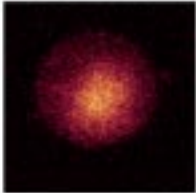

Supplement: pnas_101_14_4810__3.pdf [file pnas_101_14_4810__3.pdf]
